# Supplementary material for: Developmental loss of MeCP2 from VIP interneurons impairs cortical function and behavior
Source: eLife. 2020 Apr 28;9:e55639. doi: 10.7554/eLife.55639 (PMC7213975; doi:10.7554/eLife.55639)
Supplement: Figure 1—source data 1. [file elife-55639-fig1-data1.xlsx]

## Sheet: Sheet1
	Figure 1
		Panel	Cell Type	N	Statistical Test	Comparison	P value	U
		C	VIP	4 mice per group	Mann-Whitney U test	Control vs conditional deletion	0.031	0
			PV	4 mice per group	Mann-Whitney U test	Control vs conditional deletion	0.028	0
			SST	4 mice per group	Mann-Whitney U test	Control vs conditional deletion	0.029	0
	Figure 1 Figure Supplement 2
		Panel	Comparison	N	Statistical Test	P value	H
		B	Con vs KO	6 mice; 7 mice	Kruskal-Wallis test with Dunn's multiple comparisons test	0.001	33.42
			Con vs Dlx	6 mice; 14 mice	Kruskal-Wallis test with Dunn's multiple comparisons test	0.111	18.5
			Con vs VIP	6 mice; 4 mice	Kruskal-Wallis test with Dunn's multiple comparisons test	0.464	15.5
			Con vs PV	6 mice; 7 mice	Kruskal-Wallis test with Dunn's multiple comparisons test	>0.999	5.05
			Con vs SST	6 mice; 19 mice	Kruskal-Wallis test with Dunn's multiple comparisons test	>0.999	10.86
