# Supplementary material for: Developmental loss of MeCP2 from VIP interneurons impairs cortical function and behavior
Source: eLife. 2020 Apr 28;9:e55639. doi: 10.7554/eLife.55639 (PMC7213975; doi:10.7554/eLife.55639)
Supplement: Figure 2—source data 1. [file elife-55639-fig2-data1.xlsx]

## Sheet: Sheet1
Figure 2 Source Data
Figure 2
	Panel	Comparison	N	Statistical Test	P value	H
	C	Con vs Dlx	12 mice; 5 mice	Kruskal-Wallis test with Dunn's multiple comparisons test	0.0357	-15.07
		Con vs VIP	12 mice; 6 mice	Kruskal-Wallis test with Dunn's multiple comparisons test	>0.999	2.5
		Con vs PV	12 mice; 6 mice	Kruskal-Wallis test with Dunn's multiple comparisons test	>0.999	2.5
		Con vs SST	12 mice; 8 mice	Kruskal-Wallis test with Dunn's multiple comparisons test	0.964	-5.79
	D	Con vs Dlx	12 mice; 5 mice	Kruskal-Wallis test with Dunn's multiple comparisons test	0.0034	19.22
		Con vs VIP	12 mice; 6 mice	Kruskal-Wallis test with Dunn's multiple comparisons test	0.0305	13.92
		Con vs PV	12 mice; 6 mice	Kruskal-Wallis test with Dunn's multiple comparisons test	>0.999	-0.42
		Con vs SST	12 mice; 8 mice	Kruskal-Wallis test with Dunn's multiple comparisons test	>0.999	2.92
	E	Con vs Dlx	7 mice; 6 mice	Kruskal-Wallis test with Dunn's multiple comparisons test	0.0025	-17.3
		Con vs VIP	7 mice; 6 mice	Kruskal-Wallis test with Dunn's multiple comparisons test	0.0331	-13.46
		Con vs PV	7 mice; 5 mice	Kruskal-Wallis test with Dunn's multiple comparisons test	>0.999	-4.314
		Con vs SST	7 mice; 7 mice	Kruskal-Wallis test with Dunn's multiple comparisons test	0.0008	-18
	F	Con vs Dlx	7 mice; 5 mice	Kruskal-Wallis test with Dunn's multiple comparisons test	0.0098	15.04
		Con vs VIP	7 mice; 5 mice	Kruskal-Wallis test with Dunn's multiple comparisons test	0.039	12.44
		Con vs PV	7 mice; 5 mice	Kruskal-Wallis test with Dunn's multiple comparisons test	>0.999	1.74
		Con vs SST	7 mice; 7 mice	Kruskal-Wallis test with Dunn's multiple comparisons test	>0.999	4.57
Figure 2 Figure Supplement 1
	Panel	Comparison	N	Statistical Test	P value	H
	A	Con vs Dlx	7 mice; 5 mice	Kruskal-Wallis test with Dunn's multiple comparisons test	0.183	10.06
		Con vs VIP	7 mice; 5 mice	Kruskal-Wallis test with Dunn's multiple comparisons test	0.357	8.56
		Con vs PV	7 mice; 5 mice	Kruskal-Wallis test with Dunn's multiple comparisons test	>0.999	1.84
		Con vs SST	7 mice; 7 mice	Kruskal-Wallis test with Dunn's multiple comparisons test	>0.999	1.07
	B	Con vs Dlx	7 mice; 5 mice	Kruskal-Wallis test with Dunn's multiple comparisons test	0.0019	17.68
		Con vs VIP	7 mice; 5 mice	Kruskal-Wallis test with Dunn's multiple comparisons test	0.0154	14.6
		Con vs PV	7 mice; 5 mice	Kruskal-Wallis test with Dunn's multiple comparisons test	>0.999	2.23
		Con vs SST	7 mice; 7 mice	Kruskal-Wallis test with Dunn's multiple comparisons test	0.91	5.86
Figure 2 Figure Supplement 2
	Panel	Comparison	N	Statistical Test	P value	H
	B	Con vs Dlx	9 mice; 5 mice	Kruskal-Wallis test with Dunn's multiple comparisons test	>0.999	-1.58
		Con vs VIP	9 mice; 5 mice	Kruskal-Wallis test with Dunn's multiple comparisons test	>0.999	3.22
		Con vs PV	9 mice; 4 mice	Kruskal-Wallis test with Dunn's multiple comparisons test	>0.999	1.22
		Con vs SST	9 mice; 6 mice	Kruskal-Wallis test with Dunn's multiple comparisons test	>0.999	-1.11
	C	Con vs Dlx	9 mice; 5 mice	Kruskal-Wallis test with Dunn's multiple comparisons test	0.0039	15.67
		Con vs VIP	9 mice; 5 mice	Kruskal-Wallis test with Dunn's multiple comparisons test	0.1672	9.68
		Con vs PV	9 mice; 4 mice	Kruskal-Wallis test with Dunn's multiple comparisons test	>0.999	2.67
		Con vs SST	9 mice; 6 mice	Kruskal-Wallis test with Dunn's multiple comparisons test	0.0064	14.17
Figure 2 Figure Supplement 3
	Panel	Comparison	N	Statistical Test	P value	H
	A	Con vs WT	12 mice; 6 mice	Kruskal-Wallis test with Dunn's multiple comparisons test	>0.999	-0.33
		Con vs VIP-Cre	12 mice; 6 mice	Kruskal-Wallis test with Dunn's multiple comparisons test	>0.999	1.67
	B	Con vs WT	12 mice; 6 mice	Kruskal-Wallis test with Dunn's multiple comparisons test	>0.999	-1.83
		Con vs VIP-Cre	12 mice; 6 mice	Kruskal-Wallis test with Dunn's multiple comparisons test	>0.999	-0.81
	C	Con vs WT	7 mice; 9 mice	Kruskal-Wallis test with Dunn's multiple comparisons test	>0.999	0.62
		Con vs VIP-Cre	7 mice; 7 mice	Kruskal-Wallis test with Dunn's multiple comparisons test	>0.999	0.14
	D	Con vs WT	7 mice; 9 mice	Kruskal-Wallis test with Dunn's multiple comparisons test	0.913	-2.54
		Con vs VIP-Cre	7 mice; 7 mice	Kruskal-Wallis test with Dunn's multiple comparisons test	>0.999	-1.43
