# Supplementary material for: Developmental loss of MeCP2 from VIP interneurons impairs cortical function and behavior
Source: eLife. 2020 Apr 28;9:e55639. doi: 10.7554/eLife.55639 (PMC7213975; doi:10.7554/eLife.55639)
Supplement: Figure 3—source data 1. [file elife-55639-fig3-data1.xlsx]

## Sheet: Sheet1
	Figure 3
		Panel	Comparison	N	Statistical Test	P value	H
		A	Con vs Dlx	18 mice; 5 mice	Kruskal-Wallis test with Dunn's multiple comparisons test	>0.999	1.79
			Con vs VIP	18 mice; 5 mice	Kruskal-Wallis test with Dunn's multiple comparisons test	>0.999	1.29
			Con vs PV	18 mice; 7 mice	Kruskal-Wallis test with Dunn's multiple comparisons test	>0.999	-4.68
			Con vs SST	18 mice; 14 mice	Kruskal-Wallis test with Dunn's multiple comparisons test	>0.999	0.45
		B	Con vs Dlx	16 mice; 6 mice	Kruskal-Wallis test with Dunn's multiple comparisons test	0.004	23.01
			Con vs VIP	16 mice; 8 mice	Kruskal-Wallis test with Dunn's multiple comparisons test	0.0007	22.19
			Con vs PV	16 mice; 6 mice	Kruskal-Wallis test with Dunn's multiple comparisons test	>0.999	2.31
			Con vs SST	16 mice; 12 mice	Kruskal-Wallis test with Dunn's multiple comparisons test	0.34	8.98
		C (left)	Con vs Dlx	15 mice; 7 mice	Kruskal-Wallis test with Dunn's multiple comparisons test	0.002	21.25
		Time	Con vs VIP	15 mice; 6 mice	Kruskal-Wallis test with Dunn's multiple comparisons test	0.002	22.53
			Con vs PV	15 mice; 5 mice	Kruskal-Wallis test with Dunn's multiple comparisons test	>0.999	-5.07
			Con vs SST	15 mice; 14 mice	Kruskal-Wallis test with Dunn's multiple comparisons test	0.194	10.18
		C (right)	Con vs Dlx	15 mice; 7 mice	Kruskal-Wallis test with Dunn's multiple comparisons test	0.0086	20.11
		Approaches	Con vs VIP	15 mice; 6 mice	Kruskal-Wallis test with Dunn's multiple comparisons test	0.006	22.18
			Con vs PV	15 mice; 5 mice	Kruskal-Wallis test with Dunn's multiple comparisons test	>0.999	-7.21
			Con vs SST	15 mice; 14 mice	Kruskal-Wallis test with Dunn's multiple comparisons test	0.511	7.64
	Figure 3 Figure Supplement 1
		Panel	Mouse Line	Comparison	Statistical Test	P Value	H
		A	Con vs Dlx	15 mice; 13 mice	Kruskal-Wallis test with Dunn's multiple comparisons test	0.059	16.29
			Con vs VIP	15 mice; 5 mice	Kruskal-Wallis test with Dunn's multiple comparisons test	0.096	17
			Con vs PV	15 mice; 8 mice	Kruskal-Wallis test with Dunn's multiple comparisons test	0.092	14.5
			Con vs SST	15 mice; 14 mice	Kruskal-Wallis test with Dunn's multiple comparisons test	0.673	7.33
							U
		B (upper)	Con (n = 15)	Conspecific vs Empty	Mann-Whitney test	0.0004	45
		%Time	Dlx (n = 7)	Conspecific vs Empty	Mann-Whitney test	0.0006	0
			VIP (n = 6)	Conspecific vs Empty	Mann-Whitney test	0.0022	0
			PV (n = 5)	Conspecific vs Empty	Mann-Whitney test	0.0159	1
			SST (n = 14)	Conspecific vs Empty	Mann-Whitney test	0.3451	77
		B (lower)	Con (n = 15)	Conspecific vs Empty	Mann-Whitney test	0.0305	71
		Approaches	Dlx (n = 7)	Conspecific vs Empty	Mann-Whitney test	0.0368	5
			VIP (n = 6)	Conspecific vs Empty	Mann-Whitney test	0.0238	1.5
			PV (n = 5)	Conspecific vs Empty	Mann-Whitney test	0.0238	1.5
			SST (n = 14)	Conspecific vs Empty	Mann-Whitney test	0.4864	82.5
	Figure 3 Figure Supplement 2
		Panel	Comparison	N	Statistical Test	P value	H
		A	Con vs WT	15 mice; 5 mice	Kruskal-Wallis test with Dunn's multiple comparisons test	>0.999	-2.73
			Con vs VIP-Cre	15 mice; 6 mice	Kruskal-Wallis test with Dunn's multiple comparisons test	0.495	4.36
		B (left)	Con vs WT	15 mice; 6 mice	Kruskal-Wallis test with Dunn's multiple comparisons test	>0.999	1.93
			Con vs VIP-Cre	15 mice; 4 mice	Kruskal-Wallis test with Dunn's multiple comparisons test	>0.999	0.85
		B (right)	Con vs WT	15 mice; 6 mice	Kruskal-Wallis test with Dunn's multiple comparisons test	0.658	-3.57
			Con vs VIP-Cre	15 mice; 4 mice	Kruskal-Wallis test with Dunn's multiple comparisons test	>0.999	-0.53
