# Supplementary material for: Developmental loss of MeCP2 from VIP interneurons impairs cortical function and behavior
Source: eLife journal article supplement (doi:10.7554/elife.55639), 2020-04-28
Supplement: supp [file elife-55639-supp-v1.zip]

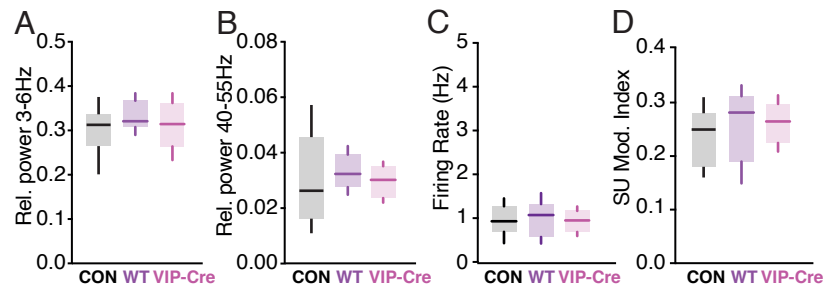

**Figure 2 - Supplemental Figure 3. No difference in neural activity among control groups.** A. Cortical relative LFP power in the 3-6Hz band in during quiescent periods in *Mecp2<sup>fl/y</sup>* controls (black; n = 12), wild-types (magenta; n = 6), and *Vip<sup>Cre</sup>* controls (pink; n = 7). B. Cortical relative LFP power in the 40-55Hz band during quiescence. C. Population average single-unit firing rate of cortical RS cells during quiescence in *Mecp2<sup>fl/y</sup>* controls (n = 7), wild-types (n = 9), and *Vip<sup>Cre</sup>* controls (n = 7). D. Modulation of single-unit firing rate in each group at locomotion onset, measured as an index value.
