# Supplementary material for: Developmental loss of MeCP2 from VIP interneurons impairs cortical function and behavior
Source: eLife journal article supplement (doi:10.7554/elife.55639), 2020-04-28
Supplement: supp [file elife-55639-supp-v1.zip]

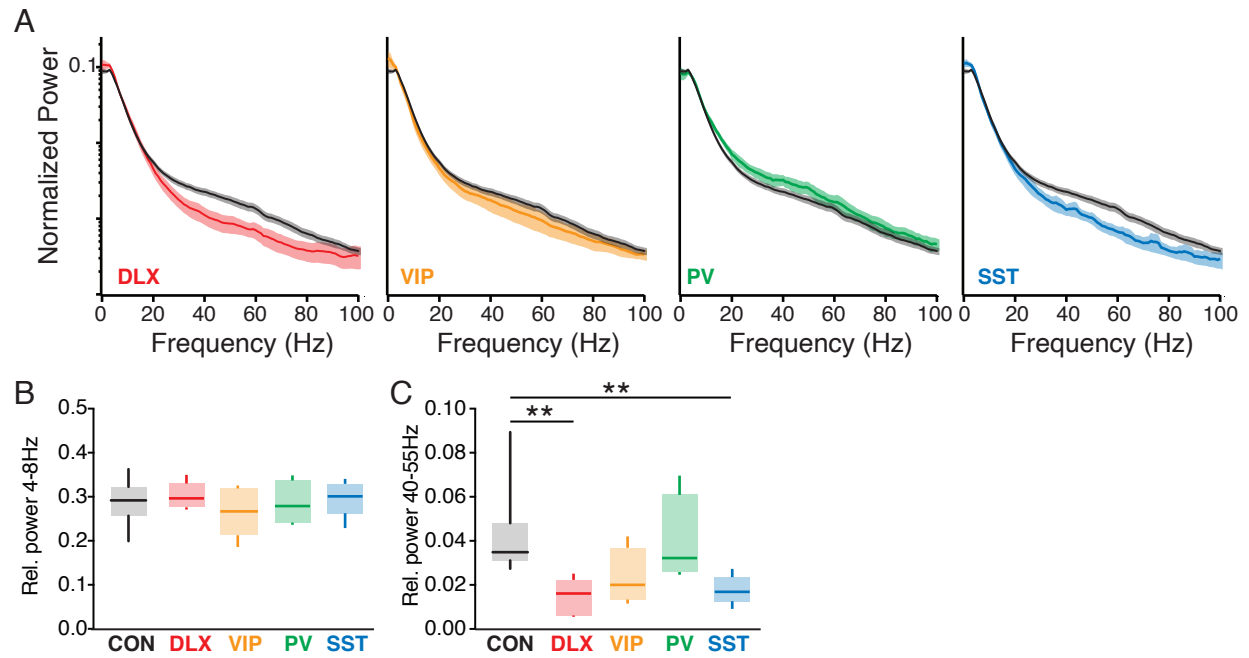

**Figure 2 - Supplemental Figure 2. Altered hippocampal activity patterns in *Mecp2* mutants.** A. Population average normalized hippocampal CA1 power spectra during quiescent sitting periods for *Dlx5/6* mutants (red; n = 5), *VIP* mutants (orange; n = 5), *PV* mutants (green; n = 4), and *SST* mutants (blue; n = 6) compared to *Mecp2<sup>fl/y</sup>* controls (black; n = 9). B. Population average hippocampal relative LFP power in the theta (4-8Hz) band in each group. D. Hippocampal relative LFP power in the gamma (40-55Hz) band in each group. \*\* p < 0.01
