# Supplementary material for: Developmental loss of MeCP2 from VIP interneurons impairs cortical function and behavior
Source: eLife journal article supplement (doi:10.7554/elife.55639), 2020-04-28
Supplement: supp [file elife-55639-supp-v1.zip]

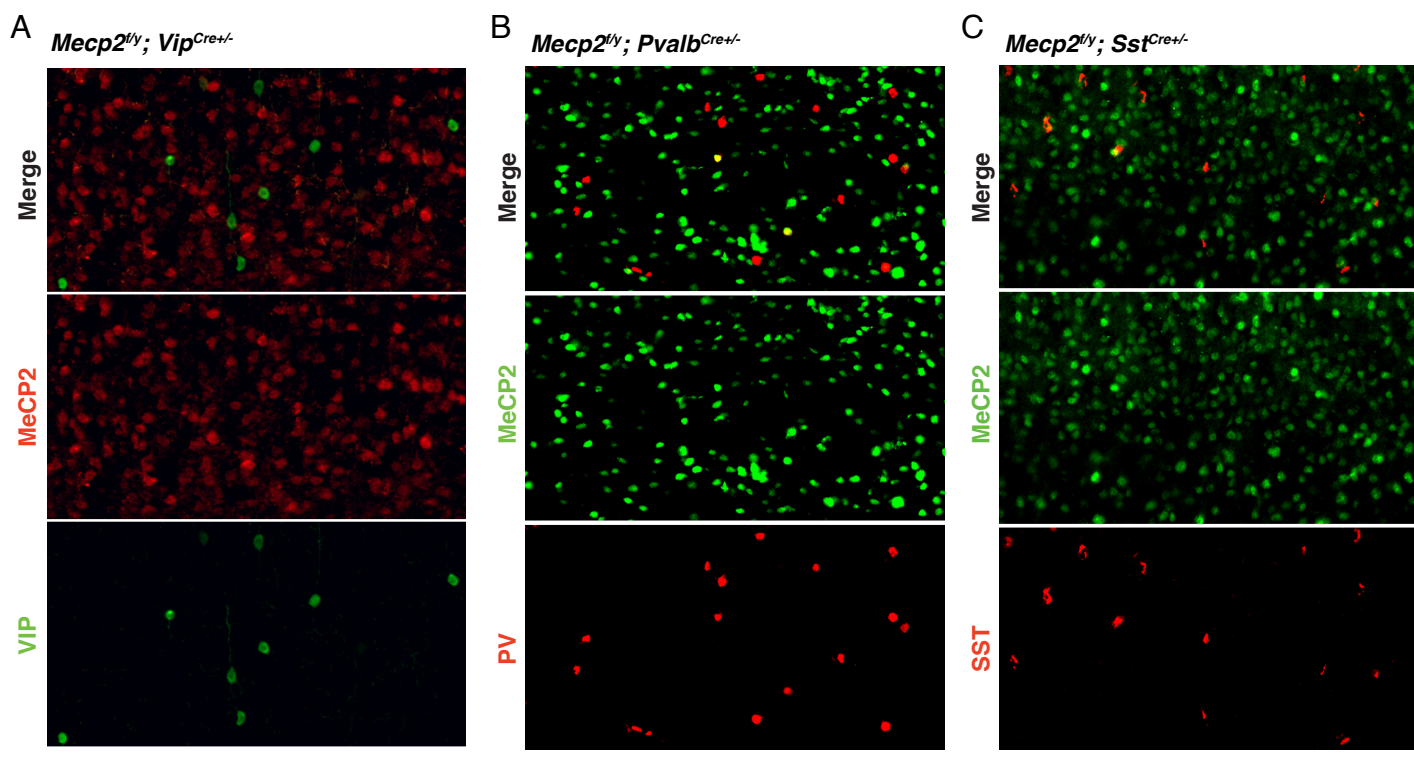

**Figure 1 - Supplemental Figure 1. MeCP2 expression in conditional deletion mice.** A. Staining for MeCP2 (red) and VIP (green) in an *Mecp2<sup>fl/y</sup> Vip<sup>Cre+/-</sup>* mouse. B. Staining for MeCP2 (green) and PV (red) in an *Mecp2<sup>fl/y</sup> Pvalb<sup>Cre+/-</sup>* mouse. C. Staining for MeCP2 (green) and SST (red) in an *Mecp2<sup>fl/y</sup> Sst<sup>Cre+/-</sup>* mouse. Scale bars denote 100µm.
