# Supplementary material for: Developmental loss of MeCP2 from VIP interneurons impairs cortical function and behavior
Source: eLife journal article supplement (doi:10.7554/elife.55639), 2020-04-28
Supplement: supp [file elife-55639-supp-v1.zip]

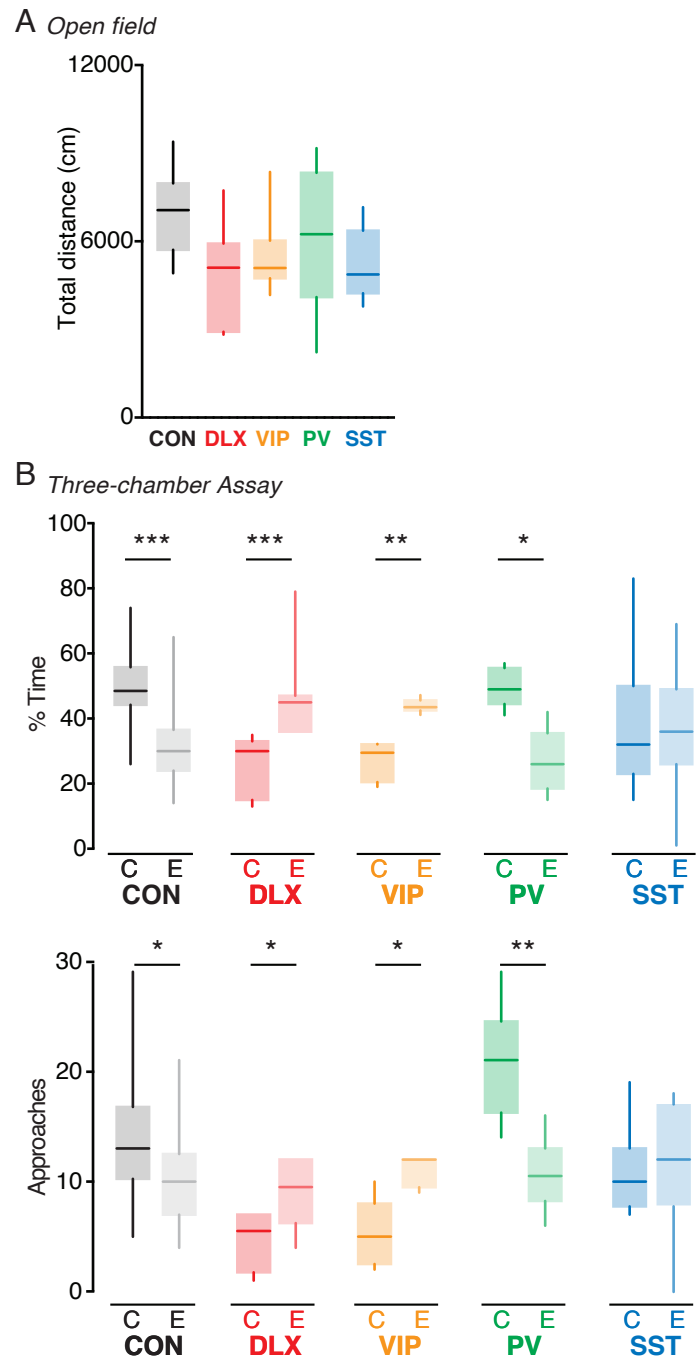

**Figure 3 - Supplemental Figure 1. Social behavior preferences are disrupted by *Mecp2* deletion from VIP interneurons.** A. Total distance traveled in the open field assay for the *Mecp2<sup>fl/y</sup>* controls (black; n = 15) and *Dlx5/6* (red; n = 13), VIP (orange; n = 5), PV (green; n = 8), and SST (cyan; n = 14). B. Upper: Mean percentage of time spent with an unfamiliar conspecific (C) in a small holding cage versus an empty cage (E) for *Mecp2<sup>fl/y</sup>* controls (n = 16) and *Dlx5/6* (n = 7), VIP (n = 6), PV (n = 5), and SST (n = 14) mutants. Lower: Mean number of approaches made to within 5 cm of the conspecific or the empty holding cage for each group. \*p < 0.05, \*\* p < 0.01, \*\*\* p < 0.001
