# Supplementary material for: Developmental loss of MeCP2 from VIP interneurons impairs cortical function and behavior
Source: eLife journal article supplement (doi:10.7554/elife.55639), 2020-04-28
Supplement: supp [file elife-55639-supp-v1.zip]

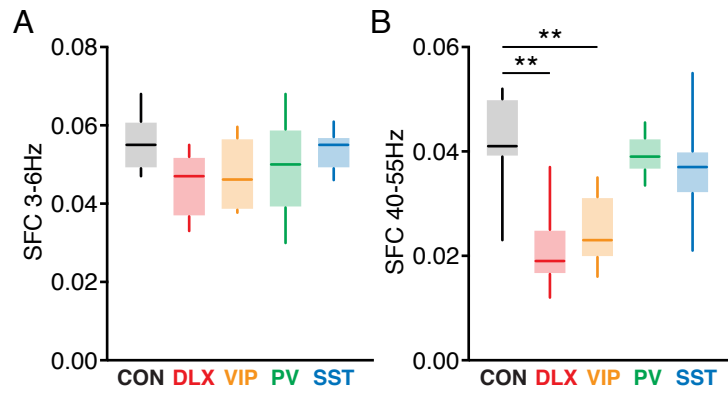

**Figure 2 - Supplemental Figure 1.** Alteration in the temporal pattern of spiking. A. Mean spike-field coherence (SFC) in the 3-6Hz band for units recorded in *Mecp2<sup>fl/y</sup>* controls (n = 7) and *Dlx5/6* (n = 5), *VIP* (n = 5), *PV* (n = 5), and *SST* (n = 7) mutants. B. Mean SFC in the 40-55Hz band. \*p < 0.05, \*\*p < 0.01
