# Supplementary material for: Developmental loss of MeCP2 from VIP interneurons impairs cortical function and behavior
Source: eLife journal article supplement (doi:10.7554/elife.55639), 2020-04-28
Supplement: supp [file elife-55639-supp-v1.zip]

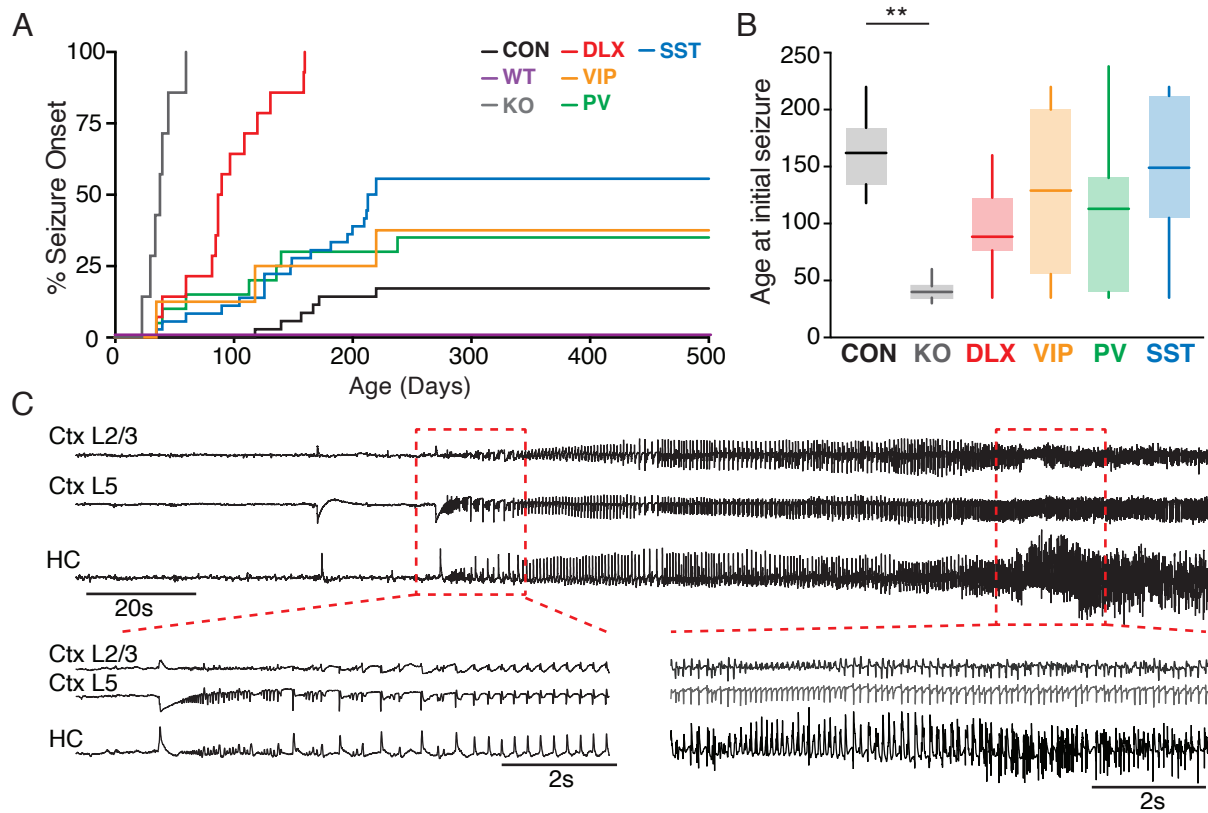

**Figure 1 - Supplemental Figure 2. Seizure incidence following conditional deletion of *Mecp2* from GABAergic interneurons.** A. Cumulative distribution plot of the ages at which animals exhibited initial seizure activity for *Mecp2<sup>fl/y</sup>* controls (black; n = 38), wild-types (magenta; n = 10), *Mecp2<sup>-y</sup>* (gray; n = 10), and *Dlx5/6* (red; n = 13), PV (green; n = 22), SST (cyan; n = 36), and VIP (orange; n = 8) mutants. B. Mean age at initial seizure for *Mecp2<sup>fl/y</sup>* controls (n = 7) and *Mecp2<sup>-y</sup>* (n = 10), *Dlx5/6* (n = 13), VIP (n = 3), PV (n = 7), and SST (n = 19) mutants. C. Example local field potential recordings from parietal cortical layers 2/3 and 5 and the CA1 of the hippocampus showing spontaneous ictal activity in an awake *Sst<sup>Cre+/+</sup>Mecp2<sup>fl/y</sup>* animal at P220. \*\*p < 0.01
