# Supplementary material for: Developmental loss of MeCP2 from VIP interneurons impairs cortical function and behavior
Source: eLife journal article supplement (doi:10.7554/elife.55639), 2020-04-28
Supplement: supp [file elife-55639-supp-v1.zip]

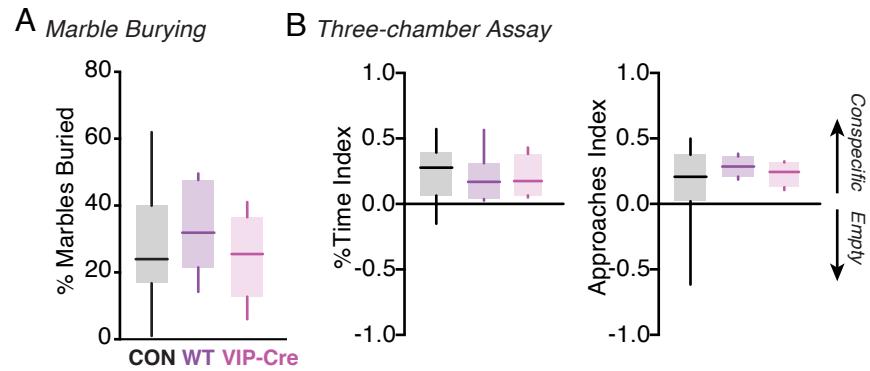

**Figure 3 - Supplemental Figure 2. No difference in behavior among control groups.** A. Mean percentage of marbles buried by *Mecp2<sup>fl/y</sup>* controls (n = 16), wild-types (n = 5), and *Vip<sup>Cre</sup>* controls (n = 4). B. Left: Preference index for time spent with an unfamiliar conspecific in a small holding cage versus an empty cage for *Mecp2<sup>fl/y</sup>* controls (n = 16), wild-types (n = 6), and *Vip<sup>Cre</sup>* controls (n = 4). Right: Preference index for approaches made to within 5 cm of the conspecific or the empty holding cage for each group.
