# Supplementary material for: Developmental loss of MeCP2 from VIP interneurons impairs cortical function and behavior
Source: eLife. 2020 Apr 28;9:e55639. doi: 10.7554/eLife.55639 (PMC7213975; doi:10.7554/eLife.55639)
Supplement: Supplementary file 1. — Summary table of phenotypes observed in conditional deletion mice with loss of Mecp2 function in GABAergic interneurons (upper) and glutamatergic excitatory neurons (lower). Observed phenotypes are noted as Y/N, assays that were not performed in a given study are left blank. The two distinct PvalbCre mouse lines used by different studies are identified by their JAX line numbers. [file elife-55639-supp1.xlsx]

## Sheet: Sheet1
Inhibitory interneurons
	Chao et al., 2010		Ito-Ishida-et al., 2015		He et al., 2014		Goffin et al., 2014			Current study
Cre Line Cross:	Viaat-Cre	Dlx5/6-Cre	Pvalb-2A-Cre*	Sst-Cre	Pvalb-Cre*	Dlx5/6-Cre	Sst-Cre	Pvalb-2A-Cre*	Dlx5/6-Cre	Vip-Cre	Sst-Cre	Pvalb-Cre*
			JAX # 012358		JAX # 008069			JAX # 012358				JAX # 008069
Decreased Survival	Y	N	Y	Y	N				Y	N	Y	N
Seizures	Y	N	N	Y (late)	N	Y	N	N	Y	N	Y (late)	N
Altered Anxiety	N	N			N				N	N	N	N
Learning and Memory Deficit	Y	N	Y	N	Y
Marble Burying Deficit			Y	Y (early)					Y	Y	N	N
Altered Social Behavior	Y	Y	Y	N	N				Y	Y	Y	N
Motor Incoordination	Y	Y	Y	N	Y
Sterotypy	Y	Y	N	Y
Altered Startle Response	Y	Y	Y	N
Obesity	Y		N	N					N	N	N	N
Excitatory neurons
	Gemelli et al., 2006	Meng et al., 2016	Goffin et al., 2014
Cre Line Cross:	CamKII-Cre	Vglut2-Cre	Emx1-Cre
Decreased Survival		Y
Seizures		Y	N
Altered Anxiety	Y	Y	N
Learning and Memory Deficit			N
Marble Burying Deficit
Altered Social Behavior	Y		N
Motor Incoordination	Y	Y
Sterotypy
Altered Startle Response		Y
Obesity		Y
